# Supplementary material
Source: Springer Nature journal article supplement (https://www.springermedizin.de/resource/supplementary/12889_2014_6629_MOESM3_ESM.pdf/9498734)

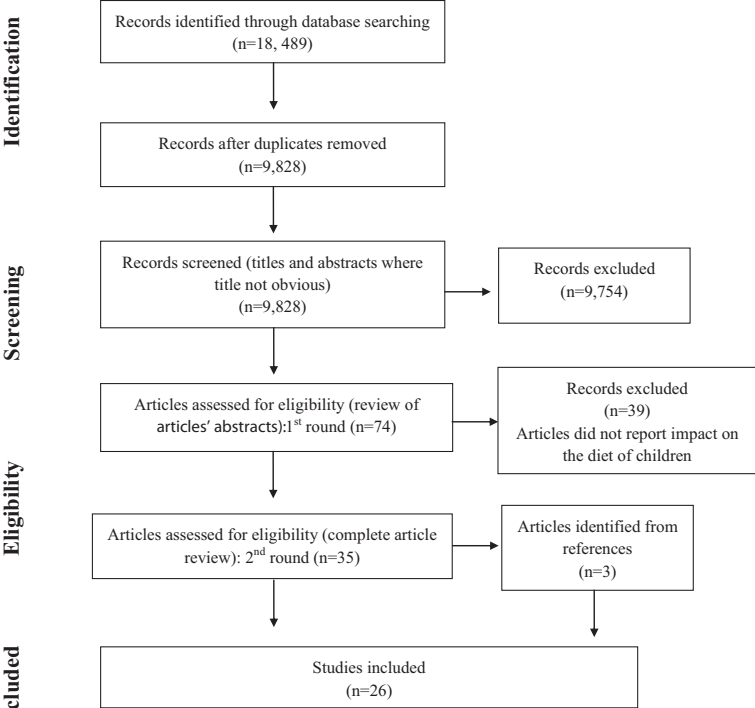

Supplement: MOESM3 [file 9498734]
